# Supplementary material
Source: publisher site journal article supplement (http://www.kjim.org/upload/media/kjim-2020-064-suppl2.pdf)
Supplement: Supplementary file 1 [file kjim-2020-064-suppl2.pdf]

**Supplementary Table 2. Comparison of clinical outcome measures according to VAT, SAT, and SMA in patients with AAV**

| Clinical outcome            | VAT (n = 117) |              |         | SAT (n = 117) |              |         | SMA (n = 117) |              |         |
|-----------------------------|---------------|--------------|---------|---------------|--------------|---------|---------------|--------------|---------|
|                             | High (n = 58) | Low (n = 59) | p value | High (n = 58) | Low (n = 59) | p value | High (n = 58) | Low (n = 59) | p value |
| Mortality (+)               | 13 (22.4)     | 2 (3.4)      | 0.002   | 8 (13.8)      | 7 (11.9)     | 0.756   | 9 (15.5)      | 6 (10.2)     | 0.389   |
| Mortality (-)               | 45 (77.6)     | 57 (96.6)    |         | 50 (86.2)     | 52 (88.1)    |         | 49 (84.5)     | 53 (89.8)    |         |
| ESRD (+)                    | 8 (13.8)      | 12 (20.3)    | 0.349   | 5 (8.6)       | 15 (25.4)    | 0.016   | 13 (22.4)     | 7 (11.9)     | 0.131   |
| ESRD (-)                    | 50 (86.2)     | 47 (79.7)    |         | 53 (91.4)     | 44 (74.6)    |         | 45 (77.6)     | 52 (88.1)    |         |
| Disease relapse (+)         | 18 (31.0)     | 16 (27.1)    | 0.642   | 17 (29.3)     | 17 (28.8)    | 0.953   | 12 (20.7)     | 22 (37.3)    | 0.049   |
| Disease relapse (-)         | 40 (69.0)     | 43 (72.9)    |         | 41 (70.7)     | 42 (71.2)    |         | 46 (79.3)     | 37 (62.7)    |         |
| Acute coronary syndrome (+) | 2 (3.4)       | 2 (3.4)      | 0.999   | 2 (3.4)       | 2 (3.4)      | 0.999   | 2 (3.4)       | 2 (3.4)      | 0.999   |
| Acute coronary syndrome (-) | 56 (96.6)     | 57 (96.6)    |         | 56 (96.6)     | 57 (96.6)    |         | 56 (96.6)     | 57 (96.6)    |         |
| Stroke (+)                  | 4 (6.9)       | 3 (5.1)      | 0.717   | 4 (6.9)       | 3 (5.1)      | 0.717   | 3 (5.2)       | 4 (6.8)      | 0.999   |
| Stroke (-)                  | 54 (93.1)     | 56 (94.9)    |         | 54 (93.1)     | 56 (94.9)    |         | 55 (94.8)     | 55 (93.2)    |         |

Values are expressed as number (%).

VAT, visceral adipose tissue; SAT, subcutaneous adipose tissue; SMA, skeletal muscle area; AAV, anti-neutrophil cytoplasmic antibody-associated vasculitis; ESRD, end-stage renal disease.
